volume of 70 ml and a potassium level of 31.8 mEq/l—the higher of two measured prearrest values), the calculated potassium infusion rate is 0.25 mEq · kg<sup>-1</sup> · h<sup>-1</sup>.

In the studies of animals receiving potassium infusions to which the authors refer, ponies tolerated 1.78–1.99 mEq · kg<sup>-1</sup> · h<sup>-1</sup> for slightly over 1 h on the average before developing terminal dysrhythmias,<sup>4</sup> and dogs received 2.0 mEq · kg<sup>-1</sup> · h<sup>-1</sup> for 3 h prior to exhibiting “impending” ventricular fibrillation.<sup>5,6</sup> Also, Hiatt and Hiatt<sup>5</sup> found that 0.3 mM/kg rapid potassium injection produced ventricular fibrillation in dogs, and not 0.1 mM/kg, as noted in the case report.<sup>1</sup> Hence, we conclude that this patient’s hyperkalemia resulted from a potassium load that was significantly less than stated in the case report and that was not given “in rates that far exceeded rates shown to cause cardiac toxicity in humans and animals.”

KEVIN D. BUCOL, M.D.  
*Cardiothoracic Anesthesiology*

CHARLES D. SHORT, M.D.  
*Transfusion Service*

*Missouri Baptist Medical Center  
3015 North New Ballas Road  
St. Louis, Missouri 63131*

Anesthesiology  
74:1169, 1991

*In Reply:*—Hyperkalemic cardiac arrest occurs when the potassium (K<sup>+</sup>) concentration gradient between interstitial fluid and the intercellular fluid of the myocardial cell decreases until cell membrane repolarization cannot occur. *In vivo* measurements of interstitial K<sup>+</sup> concentration during hyperkalemic arrest are not available. Thus, we used whole blood sample K<sup>+</sup> concentrations to reflect this gradient. Other studies of hyperkalemic arrest due to blood transfusions used blood infusion rates to reflect K<sup>+</sup> load.<sup>1–4</sup> The K<sup>+</sup> determined expresses milliequivalents per liter of fluid tested. University of Wisconsin Hospital uses ADSOL<sup>®</sup>-preserved packed red blood cells. The absolute volume of plasma in each unit is unknown. The absolute milliequivalent infusion can only be estimated. The K<sup>+</sup> in the packed red blood cell infusion significantly elevated the serum K<sup>+</sup> (measured). This resulted in increased interstitial fluid K<sup>+</sup> and cardiac arrest. The important point of the case report is that transfusion rates can exceed the ability of the body to equilibrate and normalize serum K<sup>+</sup>. The result in this case was cardiac arrest and death. In addition, the higher the K<sup>+</sup> in these units, the greater the risk may be. Since I know of no other means to estimate the K<sup>+</sup> load during transfusion than transfusion rate and unit K<sup>+</sup> concentration, I continue to advocate vigilance when transfusion rates exceed 120 ml/min.<sup>4</sup>

LESLIE C. JAMESON, M.D.  
*Associate Professor of Anesthesia*

Anesthesiology  
74:1169–1170, 1991

## Antagonism of Vecuronium-induced Neuromuscular Block

*To the Editor:*—The study by Magorian *et al.*<sup>1</sup> “addressed the clinical problem of antagonizing a profound neuromuscular blockade” induced

- ### REFERENCES
1. Jameson LC, Popic PM, Harms BA: Hyperkalemic death during use of a high-capacity fluid warmer for massive transfusion. *ANESTHESIOLOGY* 73:1050–1052, 1990
  2. Stehling LC: Recent Advances in transfusion therapy, *Advances in Anesthesia*. Volume 4. Edited by Stoelting RK, Barash PG, Gallagher TJ. Chicago, Year Book Medical Publishers, Inc., 1987, p 242
  3. Walker RH: Technical Manual. 10th edition. Arlington, American Association of Blood Banks, 1990, p 39
  4. Glazier DB, Littledike ET, Evans RD: Electrocardiographic changes in induced hyperkalemia in ponies. *Am J Vet Res* 43: 1934–1937, 1982
  5. Hiatt N, Hiatt J: Hyperkalemia and the electrocardiogram in dogs. *Basic Res Cardiol* 83:137–140, 1988
  6. Hiatt N, Chapman LW, Davidson MB, Mack H, Sheinkopf JA: Transmembrane K transfer in hyperkalemic dogs. *Horm Metab Res* 13:386–389, 1981

(Accepted for publication March 13, 1991.)

PETER M. POPIC, M.D.  
*Assistant Professor of Anesthesia*

BRUCE A. HARMS, M.D.  
*Assistant Professor of Surgery*

*University of Wisconsin Hospital and Clinics  
600 Highland Avenue, B6/387 CSC  
Madison, Wisconsin 53792*

### REFERENCES

1. Batton DG, Batton MF, Shulman G: Serum potassium changes following packed red cell transfusion in newborn infants. *Transfusion* 23:163–164, 1983
2. Blanchette VS, Gray E, Hardie MJ, MacMurray SB, Heick HMC, Rock C: Hyperkalemia after neonatal exchange transfusion: Risk eliminated by washing red cell concentrates. *J Pediatr* 105:321–324, 1984
3. Linko K, Tigerstedt I: Hyperkalemia during massive blood transfusions. *Acta Anaesthesiol Scand* 28:220–221, 1984
4. Miller RD: *Transfusion therapy, Anesthesia*. Edited by Miller RD. New York, Churchill Livingstone, 1990, pp 1467–1499

(Accepted for publication March 13, 1991.)

by vecuronium. The authors showed statistically that recovery time was the same regardless of whether neostigmine was given during deep
